# Supplementary material for: Novel Magnet and Thermoresponsive Chemosensory Electrospinning Fluorescent Nanofibers and Their Sensing Capability for Metal Ions
Source: MDPI journal article supplement (doi:10.3390/polym9040136), 2017-04-10
Supplement: s1 [file s1]

# Supplementary Materials: Novel Magnet-Responsive Chemosensory Electrospinning Fluorescent Nanofibers and Their Multifunctional Sensing Capability for pH, Temperature, and Metal Ions

Fang-Cheng Liang <sup>1,2</sup>, Yi-Ling Luo <sup>1</sup>, Chi-Ching Kuo <sup>1,\*</sup>, Bo-Yu Chen <sup>1</sup>, Chia-Jung Cho <sup>1</sup>, Fan-Jie Lin <sup>1</sup>, Yang-Yen Yu <sup>3,4</sup> and Redouane Borsali <sup>2</sup>

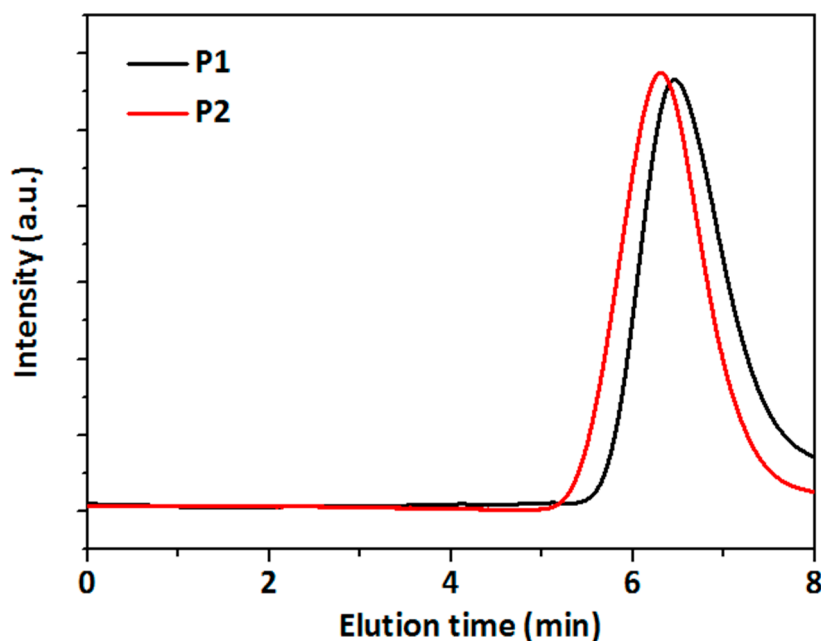

Figure S1. GPC profiles of P1 and P2 copolymers.

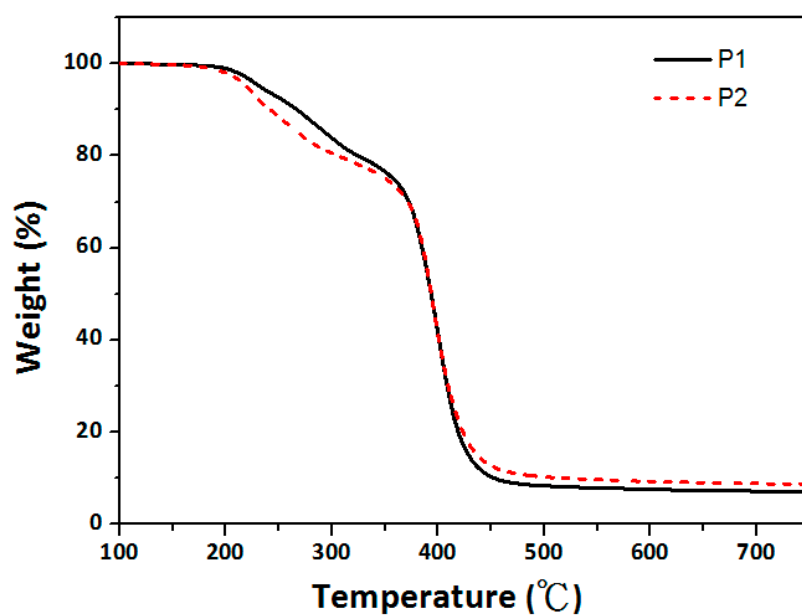

Figure S2. TGA curves of P1 and P2 copolymers with a heating rate of 10 °C min<sup>-1</sup> in a nitrogen atmosphere.

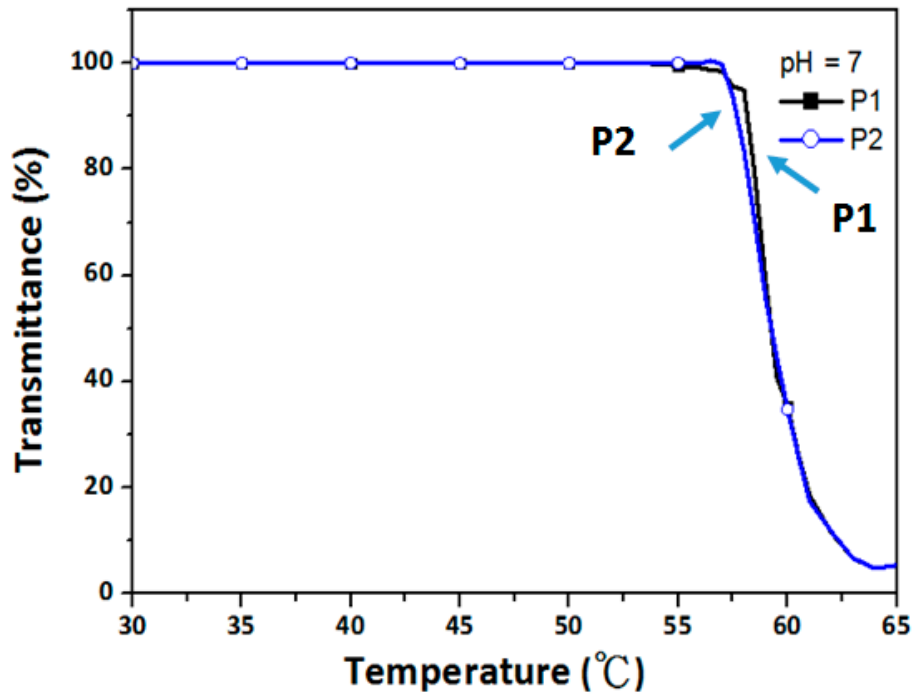

**Figure S3.** Variations in optical transmittance of P1 and P2 in pH 7 water solutions with temperatures between 30 and 65 °C.

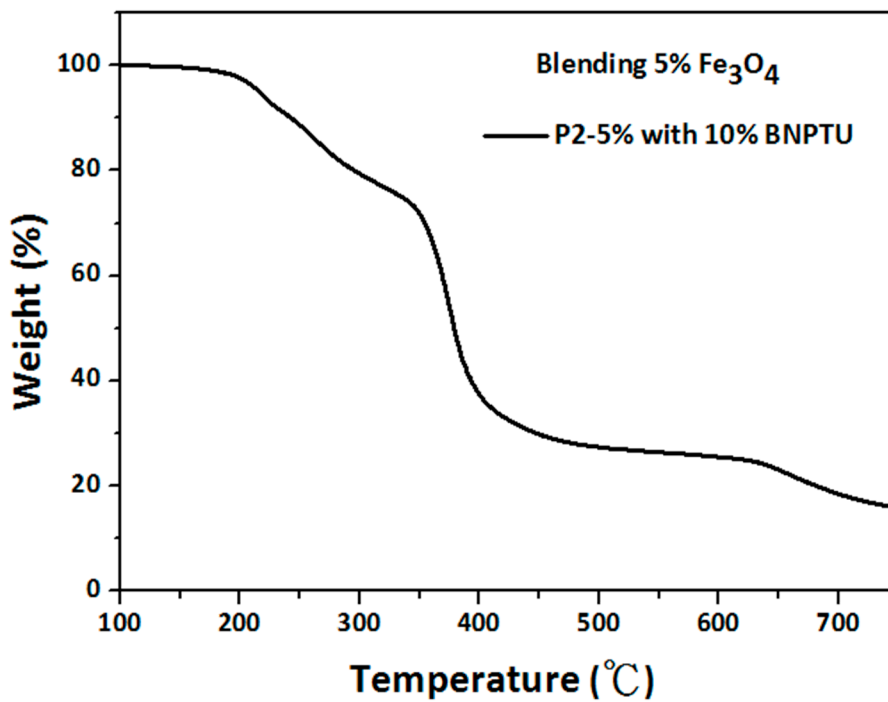

**Figure S4.** TGA curves of P2-5% blended with 5 wt% Fe<sub>3</sub>O<sub>4</sub> NP nanofibers with a heating rate of 10 °C min<sup>-1</sup> in a nitrogen atmosphere.

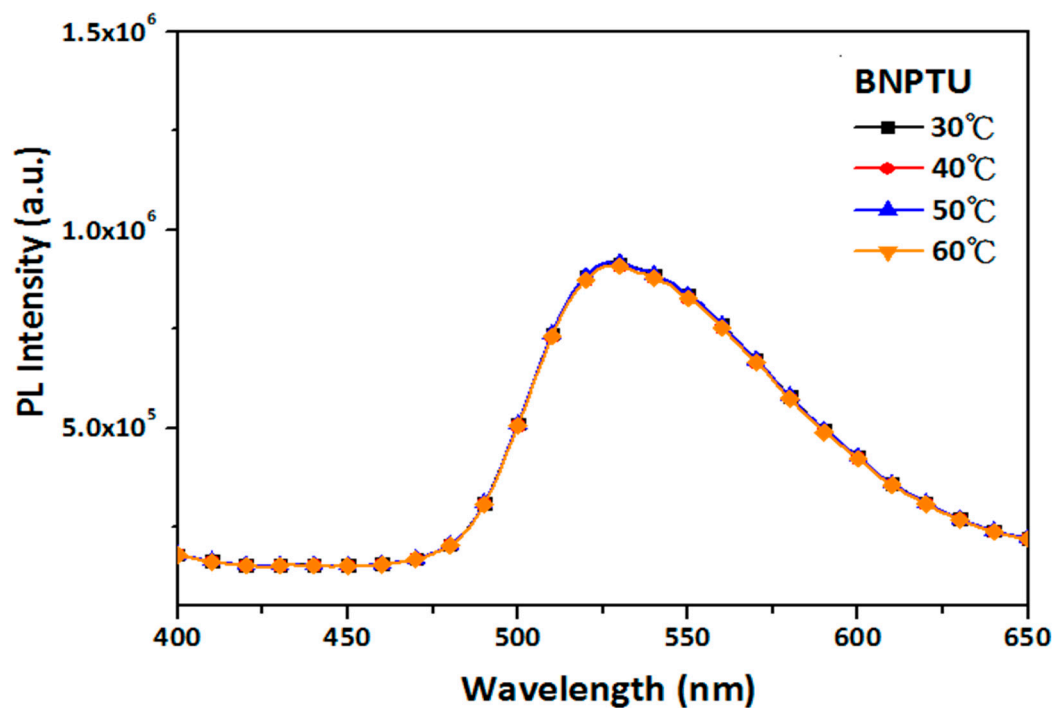

Figure S5. PL intensity of pristine BNPTU compound under a temperature increase from 30 to 60 °C.

Table S1. Time-dependent solution conductivity of the prepared Hg<sup>2+</sup> solution.

| Time (min) | Conductivity (μS/cm) |
|------------|----------------------|
| 0          | 131.2                |
| 5          | 124.5                |
| 10         | 112.8                |
| 15         | 118.3                |
| 20         | 101.4                |
